# Supplementary material for: Easy Synthesis and Characterization of Novel Carbon Dots Using the One-Pot Green Method for Cancer Therapy
Source: MDPI journal article supplement (doi:10.3390/pharmaceutics14112423), 2022-11-09
Supplement: s1 [file s1]

## ***Supplementary Materials***

### **Easy synthesis and characterization of novel carbon dots using the one-pot green method for cancer therapy**

#### **Experimental Section**

##### **S1. Fluorescence spectra of the CD<sub>C-H</sub> at different mass ratios**

The excitation and emission spectra of the CD<sub>C-H</sub> at different CMCS to mass ratios were investigated by using a Spectra Max M3 microplate reader (USA). Fluorescence emission spectra were scanned at the excitation wavelength of 357 nm for carbon dot solutions with different mass ratios and equal concentration configurations. A fixed emission wavelength of 467 nm was used to scan the fluorescence excitation spectra of carbon dot solutions with different mass ratios.

##### **S2. Loading efficiency (LE) and loading capacity (LC) of DOX-CD<sub>C-H</sub>**

The fluorescence intensity at different time points was measured by Spectra Max M3 microplate reader ( $E_x/E_m$ : 495/590 nm) to estimate the loading efficiency (LE) and loading capacity (LC) of DOX. The DOX-CD<sub>C-H</sub> solution was dialyzed against into the deionized water at room temperature in darkness for 2 h to remove unloaded DOX molecules. The final products in the dialysis bag were freeze-dried for further analysis. The loading efficiency and loading content of DOX were calculated as follows equation(Eq.S1 and Eq.S2):

$$LE(\%) = (W_{DOX} - W_{free})/W_{DOX-total} \times 100\% \quad (S1)$$

$$LC(\%) = (W_{DOX} - W_{free})/W_{CD-C-H} \times 100\% \quad (S2)$$

where  $W_{CD-C-H}$  represents the total quantity of CD<sub>C-H</sub>;  $W_{DOX-total}$  is the total amount of DOX in the reaction.

### S3. *In vitro* cytotoxicity assay

The *in vitro* cytotoxicity of CD<sub>C-H</sub> against NIH-3T3, MCF-7 and 4T1 cells was investigated using the MTT method. The detailed operation process can be summarized as follows: firstly, cells were seeded in 96-well plates (100  $\mu$ L/well) at a density of  $1\sim 2\times 10^4$  cells/well and incubated in a 5% CO<sub>2</sub> at a temperature of 37 °C for 24 h. Subsequently, the medium was removed and samples at different concentrations were replaced and then again incubated for 24 h and 48 h. After incubation, 10  $\mu$ L of MTT (5 mg/mL) solution was added to each well and incubation at 37 °C for an additional 4 h. After removing that culture medium, 200  $\mu$ L of DMSO was added to fully dissolve the crystal of formazan, and the absorbance of each well was estimated at 490 nm using SpectraMax M3 microplate reader (USA).

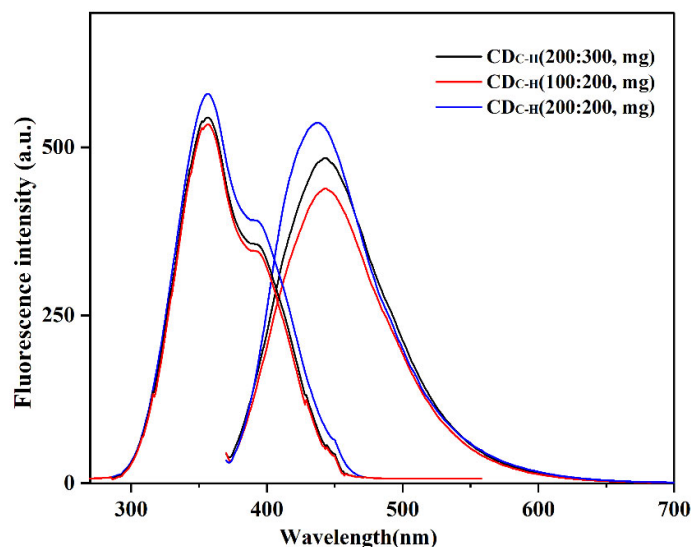

**Figure S1.** The excitation and emission spectra of the CD<sub>C-H</sub> at different CMCS to mass ratios.

**Table S1.** Hydrate particle sizes (PS) and particle size distribution index (PDI), loading efficiency (LE) and loading content (LC) of DOX-CD<sub>C-H</sub> complexes. Values are mean  $\pm$  SD ( $n = 3$ ).

| Sample                | LC (%)           | LE (%)          | Hydrate Particle Sizes | PDI              |
|-----------------------|------------------|-----------------|------------------------|------------------|
| DOX-CD <sub>C-H</sub> | 36.73 $\pm$ 1.98 | 6.11 $\pm$ 1.60 | 201.06 $\pm$ 4.92      | 0.23 $\pm$ 0.041 |

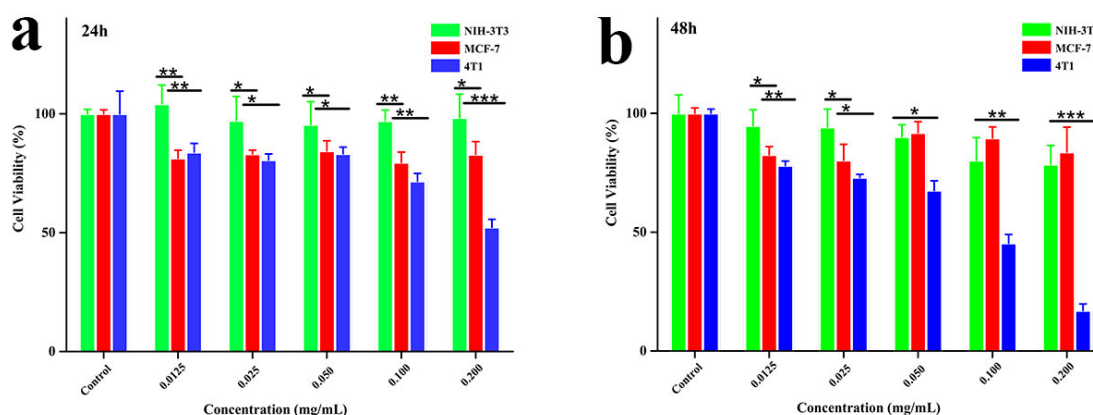

**Figure S2.** Cytotoxicity results of the CD<sub>C-H</sub> to NIH-3T3, MCF-7 and 4T1 cells at 24h (a) and 48h (b); Data represent mean  $\pm$  SD,  $n = 3$ ; \* $p < 0.05$ , \*\* $p < 0.01$  and \*\*\* $p < 0.001$ , vs. NIH-3T3 cells.
